# Supplementary material
Source: PubMed Central journal article supplement (PMC4243356)
Supplement: ASN.2013121270_ASN2013121270SupplementaryData.pdf [file ASN.2013121270_ASN2013121270SupplementaryData.pdf]

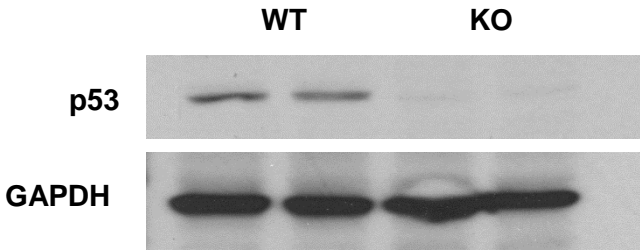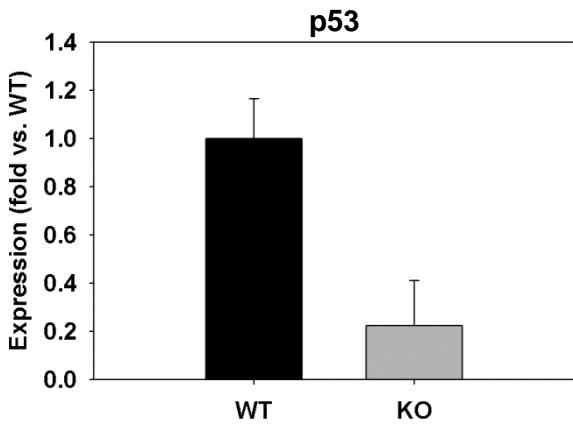

**Figure S1.** Western blot showing p53 levels in proximal tubules of WT and KO mice before IRI.

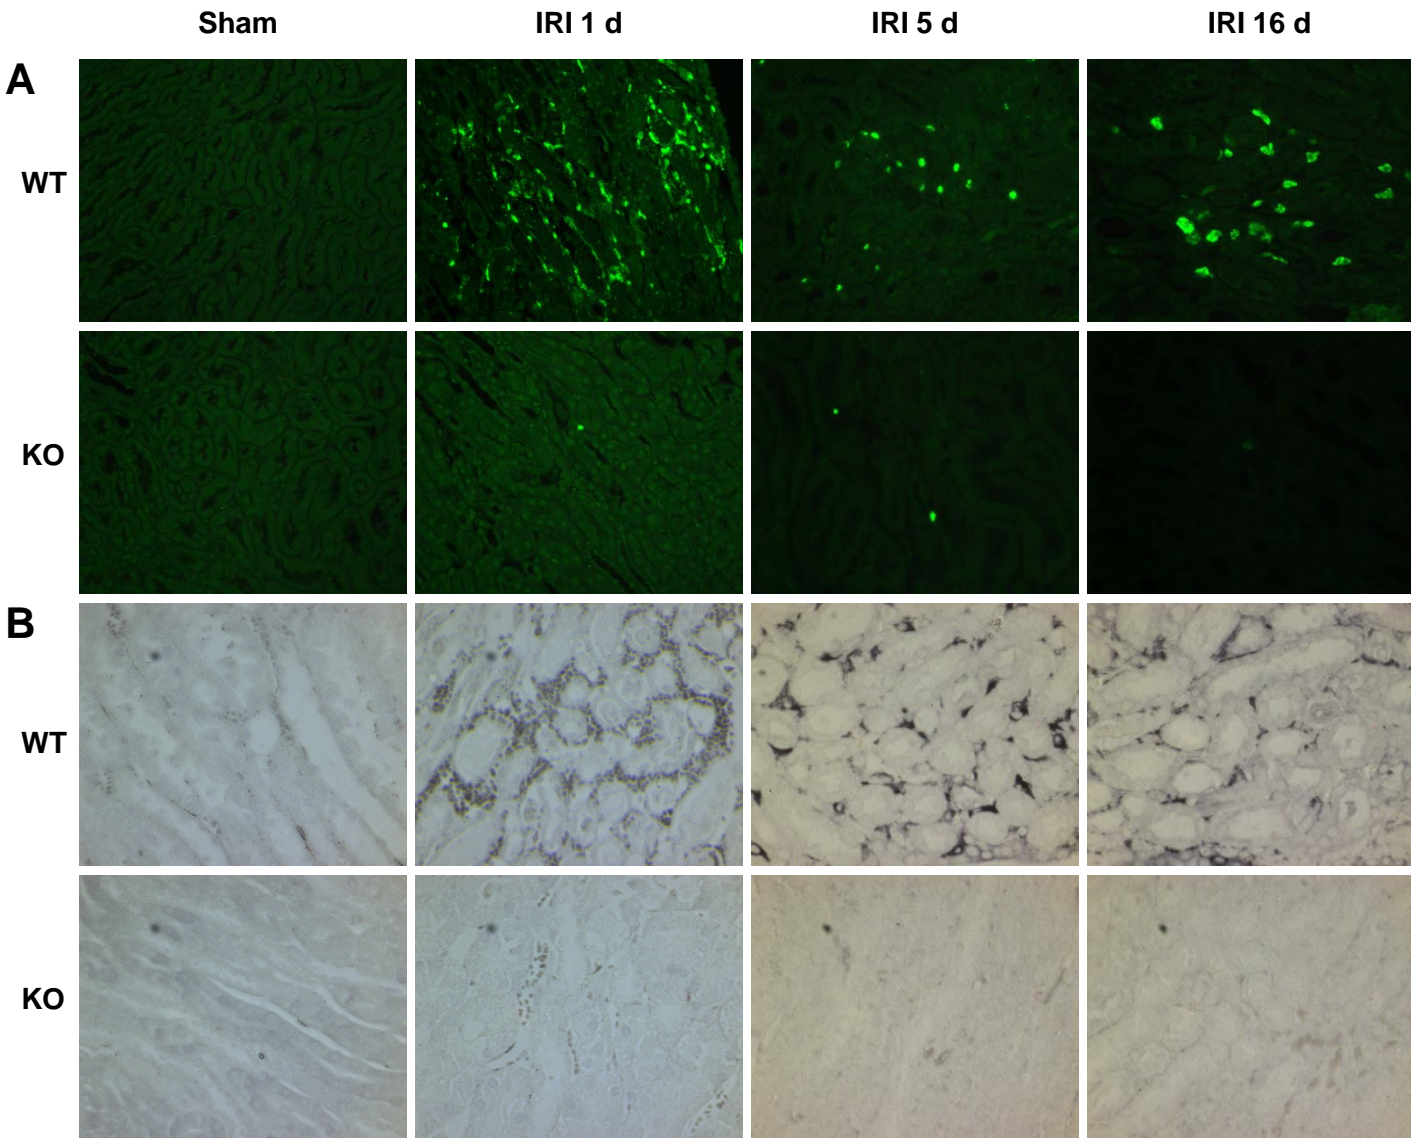

**Figure S2.** (A) Typical neutrophil and macrophage accumulation in the outer medulla of WT and p53 KO kidneys at 1, 5 and 16 days post IRI. Neutrophils (PMN) were identified by immunofluorescence using a neutrophil-specific antibody. (B) Macrophages were identified by DAB staining using anti-F4/80 antibody. Images are representative of four independent experiments.

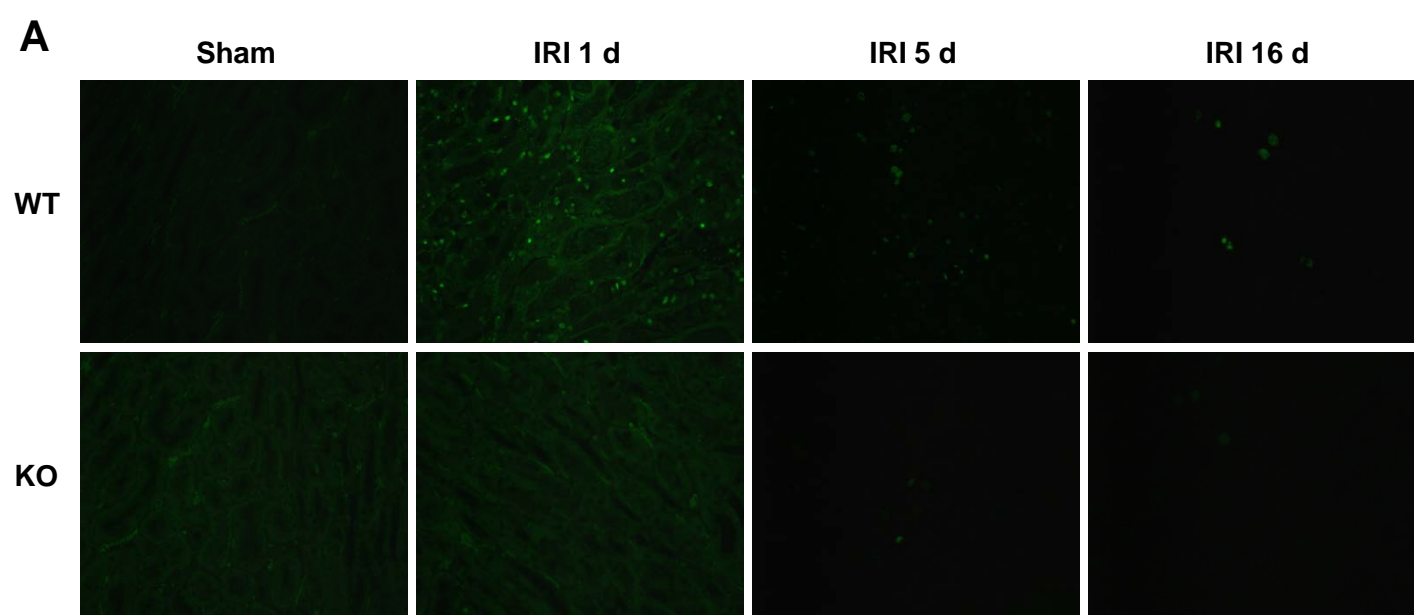

**Figure S3.** (A) Apoptosis detection by TUNEL staining in WT and p53 KO kidneys at 1, 5 and 16 days post IRI. Images are representative of four independent experiments.

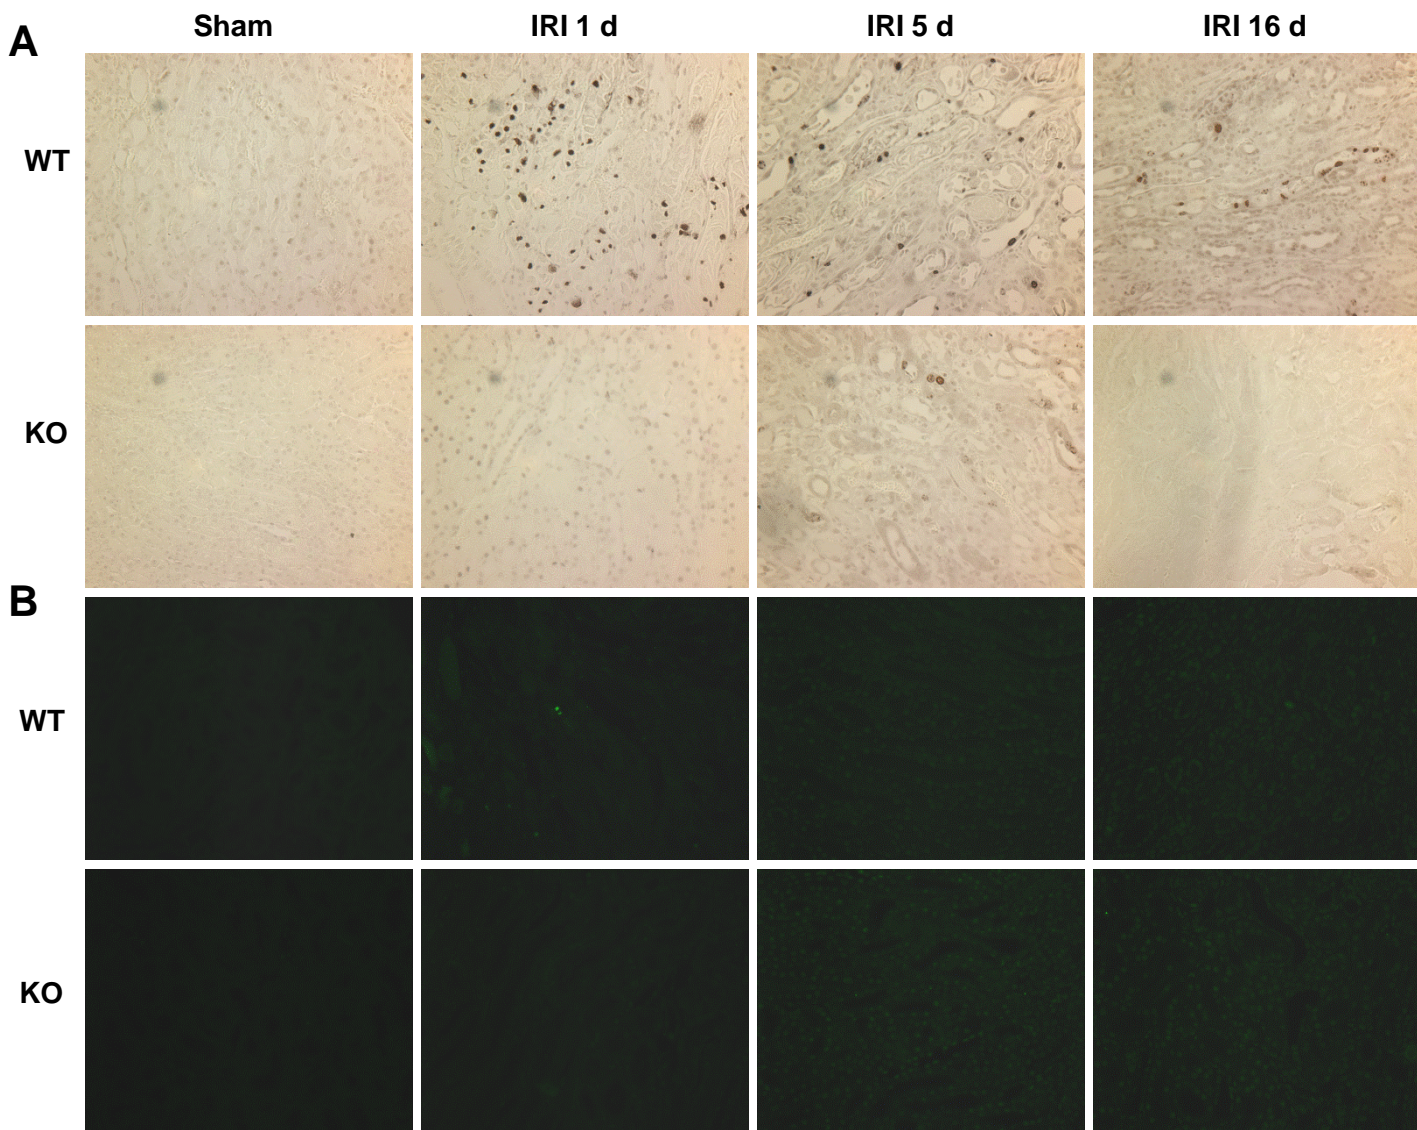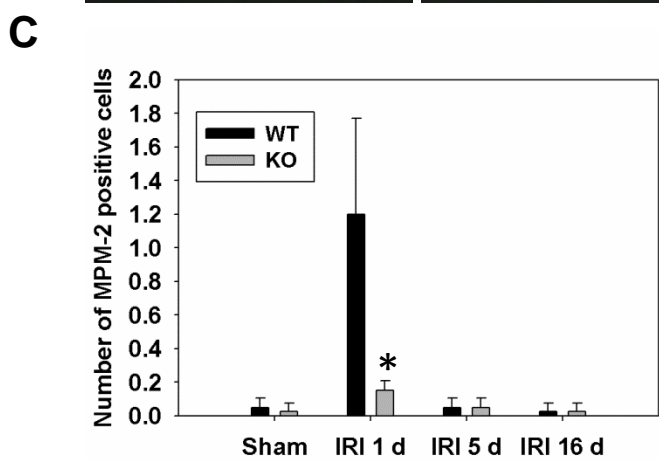

**Figure S4.** (A) Cell cycle arrest at G2/M phase was analyzed by p-H3 staining. Representative images of p-H3 staining in WT and p53 KO kidneys at 1, 5 and 16 days after IRI. Images are representative of five independent experiments. (B, C) Cells at M phase were marked by anti-phospho-Ser/Thr-Pro MPM-2 antibodies. \*  $P < .05$  compared with WT-IRI 1 d;  $n=4$ .
